# Supplementary material for: Synthesis of a model DEF-ring core of hexacyclinic acidElectronic supplementary information (ESI) available: experimental procedures and characterisation data. See http://www.rsc.org/suppdata/cc/b3/b303706a/
Source: Royal Society of Chemistry journal article supplement (doi:10.1039/b303706a), 2003-01-01
Supplement: b303706a.doc [file b303706a.doc]

Supplementary Information

**Synthesis of a Model DEF-Ring Core of Hexacyclinic acid.**

**Paul A. Clarke* Matthew Grist, Mark Ebden and Claire Wilson**

**Nine membered carbocycle *7***

A solution of **4** (240 mg, 0.550 mmol) in THF (6 ml) was added to a flask containing sodium hydride (22 mg, 0.56 mmol) and the solution was stirred for 15 min. The yellow solution was drawn into a syringe and the syringe was equipped with a needle fitted with a small glass wool plug. The solution was added to a solution of tetra*kis*triphenylphosphine palladium (32.0 mg, 0.027 mmol) and ligand (0.054 mmol) in THF (5 ml) at heated at relux at a rate of 4.76 ml h-1. The resulting mixture was heated at reflux for a further 1 h before being allowed to cool to room temperature. The mixture was filtered through a plug of silica with ether (75 ml) and concentrated in *vacuo*. The resulting oil was subjected to column chromatography (CH2Cl2 elution) to give the product **7**, seven membered ring **8** and a diene **9**.

9-membered ring **7**: Yield 61%. 1H NMR (400 MHz, CDCl3)  5.33 (1H, t, *J* = 8.5 Hz), 4.09 (1H, tt, *J* = 9.5, 3.5 Hz), 3.39 (1H, dd, *J* = 10.8, 3.1 Hz), 2.92 (1H, dd, *J* = 14.3, 9.1 Hz), 2.73 (1H, m), 2.59 (1H, dd, *J* = 14.3, 3.0 Hz), 2.46 (1H, ddd, *J* = 14.3, 7.2, 3.0 Hz), 2.28 (1H, ddd, *J* = 13.9, 12.0, 4.3 Hz), 1.89 (1H, tt, *J* = 13.5, 4.5 Hz), 1.79 (1H, dt, *J* = 14.0, 4.5 Hz), 1.70 (1H, m), 1.69 (3H, s), 1.57 (9H, s), 0.89 (9H, s), 0.11 (3H, s) and 0.9 (3H, s) ppm; 13C NMR (67.8 MHz, CDCl3)  207.8, 168.5, 139.2, 121.4, 82.0, 68.2, 59.9, 50.3, 35.6, 28.1, 28.0, 27.3, 26.9, 25.9, 22.8, 18.1, -4.7 and –4.7 ppm; IR (CHCl3): 2956, 2931, 2884, 2858, 2253, 1738, 1705, 1472, 1369.0, 1336, 1309, 1277, 1257, 1147, 1070 and 837 cm-1; *m/z* (CI NH3) 400 (M + NH4+), 383 (M + H+), 344 (M + NH4+ - *t-*Bu), 327 and 283. (found 383.2622, for C21H39O4Si requires 383.2617).

**DF-ring system *12***

To a mixture of iodine (96 mg, 0.38 mmol) and silver acetate (64 mg, 0.38 mmol) was added acetic acid (2.7 ml). The mixture was stirred for 30 min before being transferred *via* syringe to a solution of **7** (50 mg, 0.13 mmol) in acetic acid (1.0 ml). The mixture was stirred for 1 h before being diluted with water (50 ml) and neutralised with NaHCO3. The resulting solution was saturated with sodium chloride and extracted with CH2Cl2 (3  25 ml). The organic phase was washed with sodium thiosulfate solution (1  20 ml), water (2  20 ml), brine (1  25 ml), dried (MgSO4) and concentrated in *vacuo*. The resulting oil was subjected to column chromatography (98 : 2 petrol / ether) to give **11** (46 mg, 61%) as a colourless oil.

To a solution of **11** (46.0 mg, 0.079 mmol) in MeCN (3.75 ml) was added 48% aqueous HF (0.2 ml) and the mixture stirred for 12 h. The mixture was quenched by the addition of saturated aqueous NaHCO3 (10 ml). The mixture was diluted with ether (50 ml) and washed successively with saturated aqueous NaHCO3 (2  20 ml), water (2  20 ml) and brine (20 ml). The aqueous washes were extracted with ether (4  20 ml) and the combined organics dried (MgSO4) then concentrated in *vacuo*. The resulting oil was subjected to column chromatography (2:1 petrol/ether elution) to give the free alcohol (37 mg, 100%), which was subjected to 48% aqueous HF (0.16 ml) in MeCN (1.7 ml) and the mixture stirred for a further 16 h. The mixture was quenched by the addition of saturated aqueous NaHCO3 (15 ml). This was diluted with ether (50 ml) and washed successively with saturated aqueous NaHCO3 (2  20 ml), water (2  20 ml) and brine (20 ml). The aqueous washes were extracted with ether (4  20 ml) and the combined organics dried (MgSO4) and concentrated in *vacuo*. The resulting oil was subjected to column chromatography (1:1 petrol/ether elution) to give **12** (33 mg, 97%).1

1H NMR (400 MHz, CDCl3)  4.44 (1H, m), 4.06 (1H, dd, *J* = 12.6, 4.6 Hz), 3.41 (1H, s), 2.64 (1H, m), 2.56-2.51 (2H, m), 2.44 (1H, dd, *J* = 14.4, 12.0 Hz), 2.31 (1H, ddd, *J* = 14.0, 8.4, 2.3 Hz), 2.23 (1H, m), 1.84 (1H, dd, *J* = 14.4, 3.5 Hz), 1.74 (1H, ddd, *J* = 14.4, 4.5, 2.4 Hz), 1.59 (1H, m), 1.49 (9H, s), 1.44 (1H, d, *J* = 4.0 Hz) and 1.40 (3H, s) ppm; 13C NMR (67.8 MHz, CDCl3)  169.3, 96.4, 82.5, 77.4, 64.6, 56.1, 40.2, 34.7, 33.6, 30.6, 29.3, 28.3 and 28.1 ppm; IR (CHCl3): 3154, 2984, 2901, 2253, 1817, 1793, 1642, 1560, 1471, 1382, 1166 and 1096cm-1; *m/z* (CI NH3) 430 (M + NH4+), 412 (M+), 395 (M+ - OH). . (found 395.0714, for C15H23O4I requires 395.0719).

# **DEF- ring core *13***

To a solution of **12** (37.0 mg, 0.087 mmol) in CH2Cl2 (2ml) was added TFA (0.01 ml, 0.10 mmol) and the mixture stirred for 4 days. Further portions (0.01 ml, 0.10 mmol) of TFA were added after 24, 48 and 72 h. The mixture was diluted with CH2Cl2 and washed successively with saturated aqueous NaHCO3 (10 ml) and brine (20 ml). The aqueous washes were extracted with CH2Cl2 (2 10 ml) and the combined organics dried (MgSO4) and concentrated in *vacuo*. The resulting oil was subjected to column chromatography (4:1 hexane/ether elution) to give **13** (22 mg, 63%).

1H NMR (400 MHz, CDCl3)  5.52 (1H, dddd, *J* = 12.3, 6.5, 6.5, 3.2 Hz), 4.06 (1H, m), 2.74 - 2.62 (4H, m), 2.46 (1H, m), 2.29 (1H, m), 2.09 (1H, dd, *J* = 14.3, 3.1 Hz), 1.85 (1H, ddd, *J* = 15.2, 4.2, 2.8 Hz), 1.68 (1H, ddd, *J* = 15.2, 7.1, 3.3 Hz) 1.44 (1H, s) and 1.42 (3H, s) ppm; 13C NMR (67.8 MHz, CDCl3)  172.7, 95.9, 78.1, 72.8, 54.7, 35.7, 34.5, 31.3, 29.2, 28.0 and 27.4 ppm; IR (CHCl3): 3573, 3186, 2932, 1780, 1712, 1453, 1380, 1360, 1300, 1152, 1118, 1085, and 1060 cm-1.

**Notes:**

1. Best results were always achieved using this two step procedure.
